# Supplementary material for: Repeated exposure of anticancer agents to tumorspheres in open-surface microwell arrays for modeling chemotherapy-induced dormancy in colorectal cancer
Source: Royal Society of Chemistry journal article supplement (doi:10.1039/d5lc00453e), 2025-11-24
Supplement: d5lc00453e1.pdf [file d5lc00453e1.pdf]

Supplementary Information (SI) for Lab on a Chip.

This journal is © The Royal Society of Chemistry 2025

## Repeated Exposure of Anticancer Agents to Tumorspheres in Open-Surface Microwell Arrays for Modeling Chemotherapy-Induced Dormancy in Colorectal Cancer

Hui Kang <sup>§a</sup>, Xiaogang Wang <sup>§b</sup>, Weijie Ye <sup>b</sup>, Yanzhang Luo <sup>b</sup>, Jueming Chen <sup>a</sup>, Ziqing Ma <sup>c</sup>, Jiayu Li <sup>c</sup>, Lihui Wang<sup>\*c</sup>, Dongguo Lin <sup>\*b</sup>, Dayu Liu<sup>\*ab</sup>

### Supplementary Data and Methods

**Figure S1. Investigation of fluid disturbance of tumorspheres in the microwells**

**Figure S2. Recovery of tumorspheres from the microwell array**

**Figure S3. Tumorspheres generated through the microwell array culture of HCT116 cells**

**Figure S4. Representative images showing multiple tumorsphere formation in the ULA 96-well plate**

**Figure S5. Representative images showing incomplete elimination of cell adhesion in the ULA 96-well plate**

**Figure S6. Live/dead staining of cells in C2 tumorspheres after a 40-day drug-free interval**

**Figure S7. Volcano plots depict the differentially expressed genes between experimental conditions, highlighting changes in tumorsphere cells derived from colorectal cancer subsequent to drug administration.**

**Figure S8. Survival rate of cells within C2 tumorspheres following drug treatments with FOLFIRINOX (1×) in combination with potential dormancy inhibitors**

**Methods for fluid simulation and contact angle measurement.**

<sup>a</sup> Department of Laboratory Medicine, the Second Affiliated Hospital, School of Medicine, South China University of Technology, Guangzhou 510180, Guangdong, China

<sup>b</sup> Guangzhou First People's Hospital, Guangzhou 510180, Guangdong, China

<sup>c</sup> Department of Pathology, School of Medicine, Jinan University, Guangzhou 510632, China.

<sup>§</sup>Authors Kang H. and Wang X. contributed equally and share the first authorship.

<sup>\*</sup>Wang L., Email: wanglh@jnu.edu.cn; Lin D., Email: eyindg@scut.edu.cn; <sup>\*</sup>Liu D., Email: eydyliu@scut.edu.cn

<sup>†</sup> Footnotes relating to the title and/or authors should appear here.

Supplementary Information available: [details of any supplementary information available should be included here]. See DOI: 10.1039/x0xx00000x

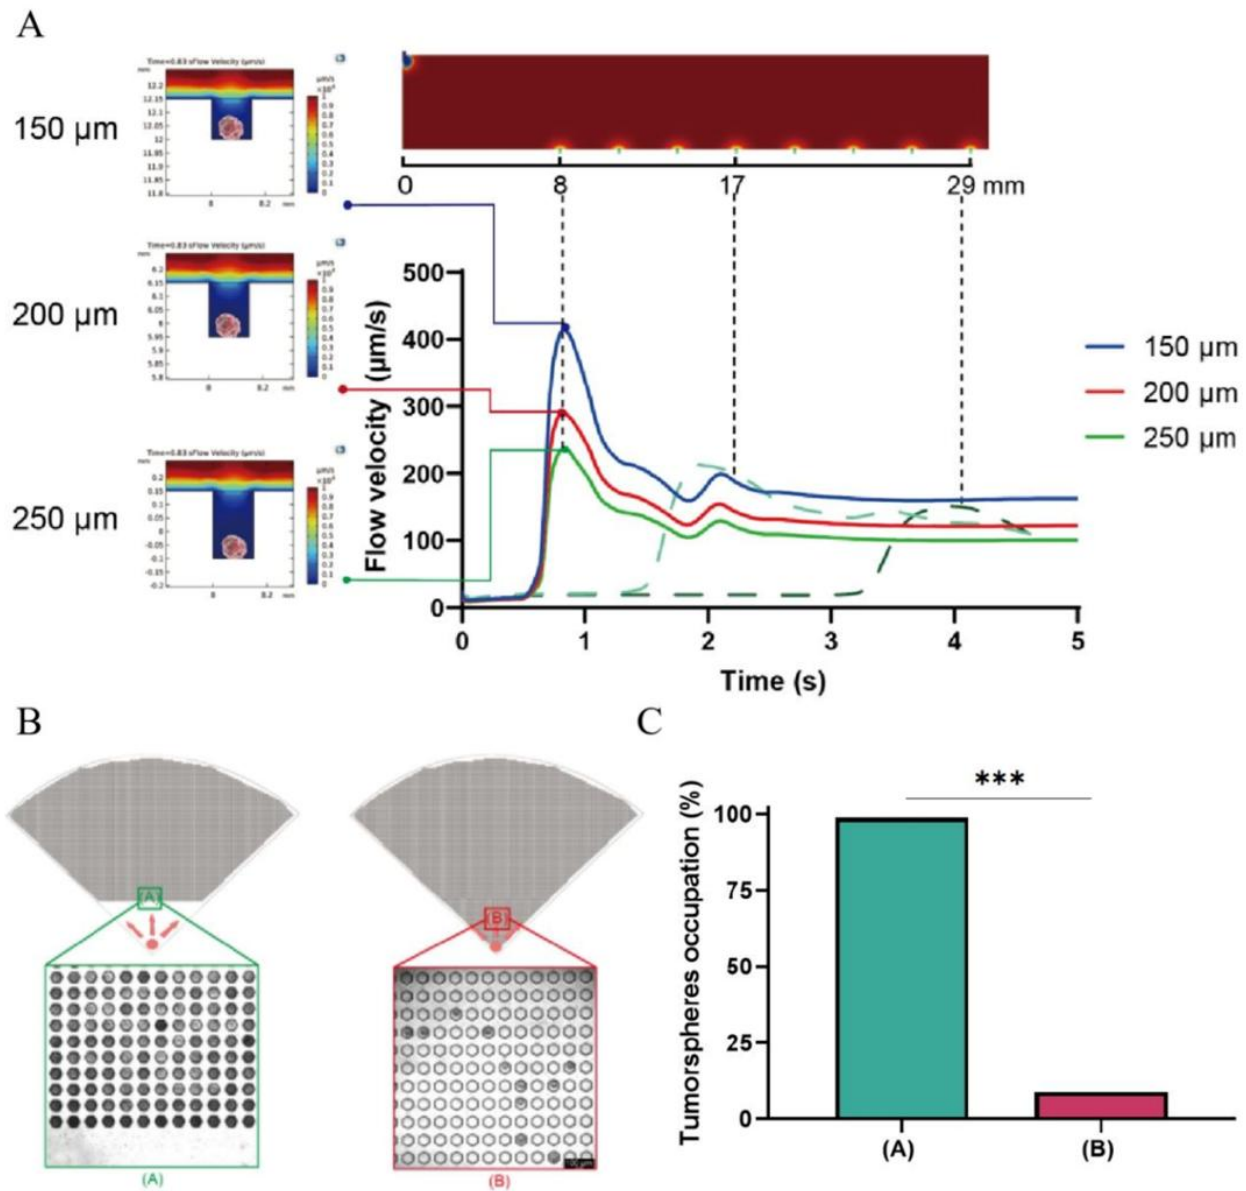

**Figure S1. Investigation of fluid disturbance of tumorspheres in microwells.** A) Simulation of the disturbance of fluid flow to the liquid within microwells of varying depths. B) Occupation of tumorspheres within the microwell array, both with and without a liquid flow buffer area. C) Occupation rate of tumorspheres in the fluid exchange area following fluid exchange, as observed under an optical microscope(scale bar:100  $\mu\text{m}$ ).

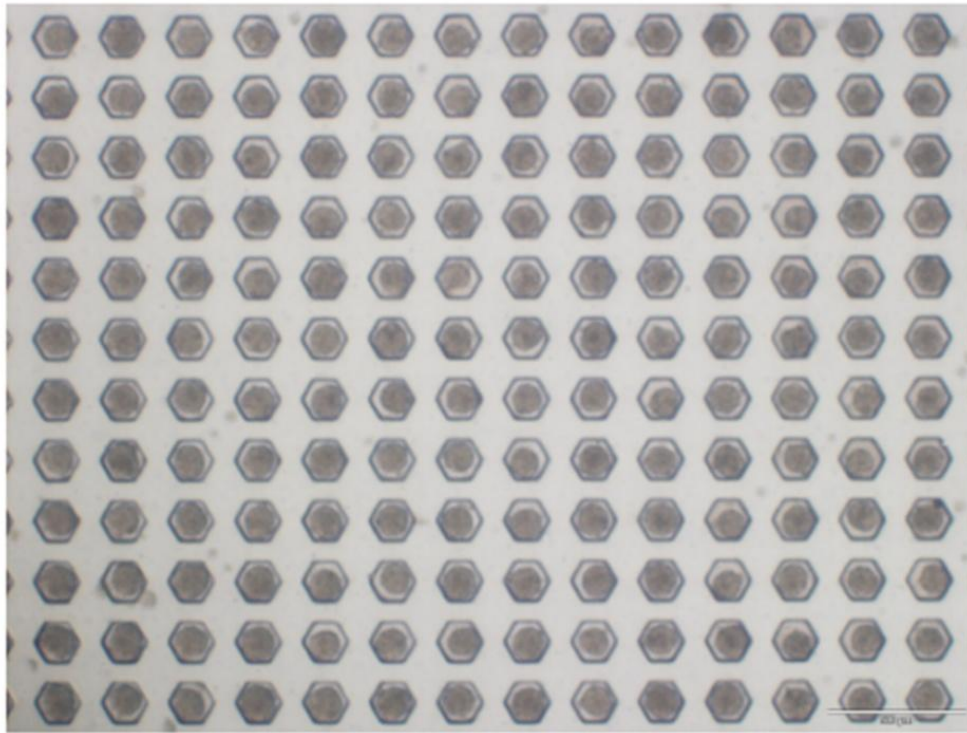

↓ Recovered

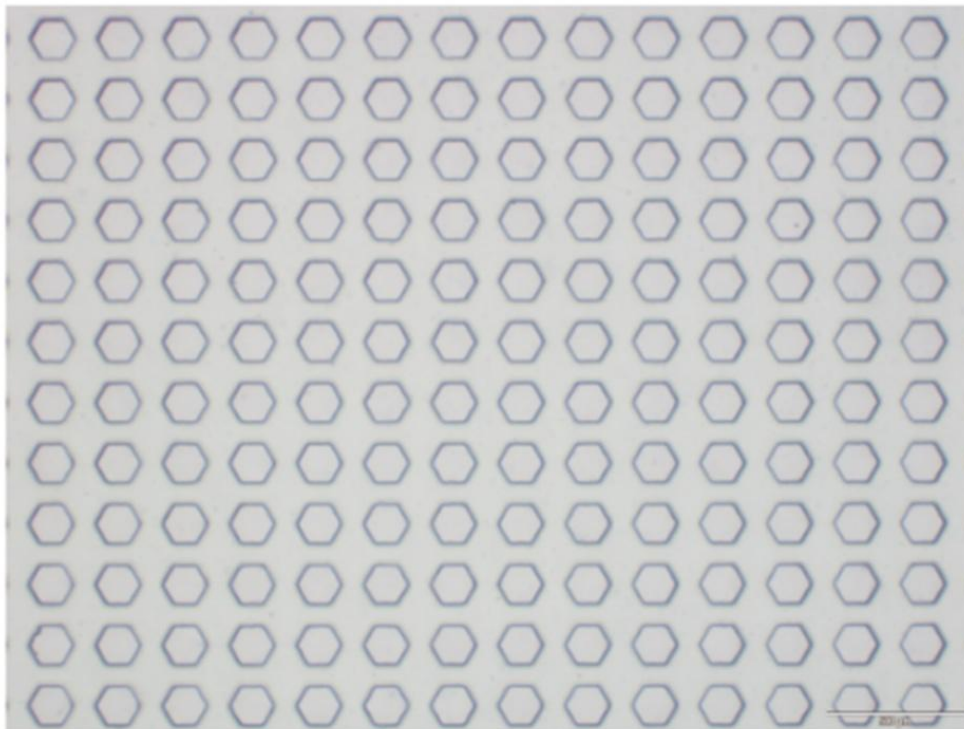

**Figure S2. Recovery of tumorspheres from the microwell array (scale bar:200  $\mu\text{m}$ ).**

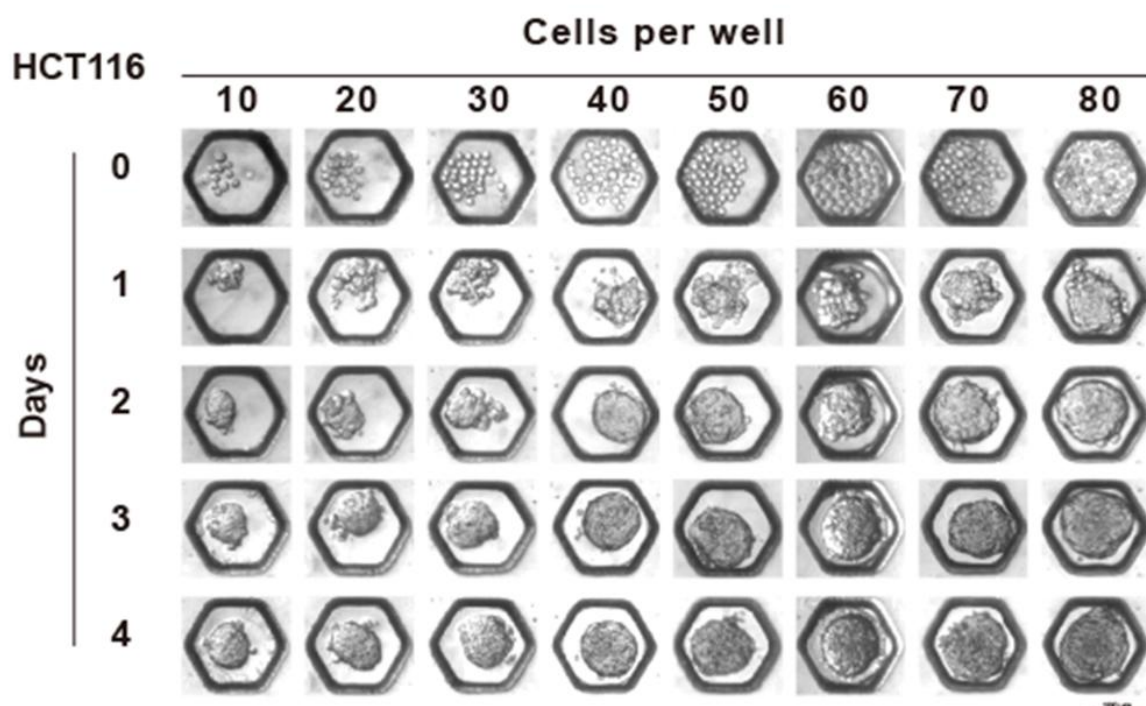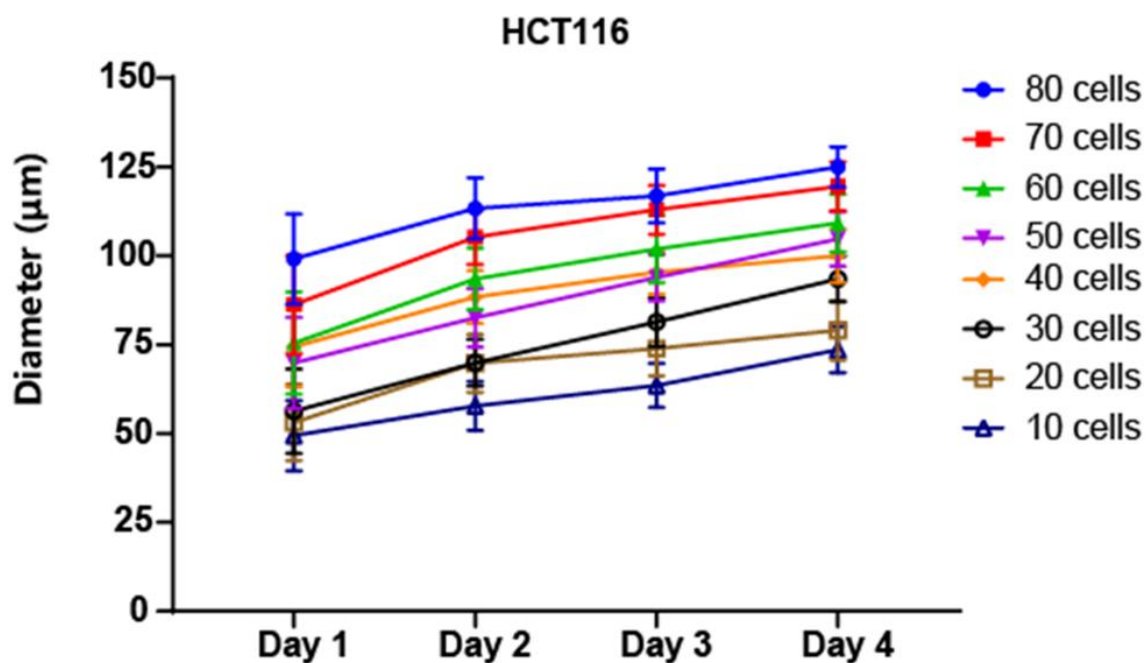

Figure S3. Tumorspheres generated through the microwell array culture of HCT116 cells(scale bar:100  $\mu$ m).

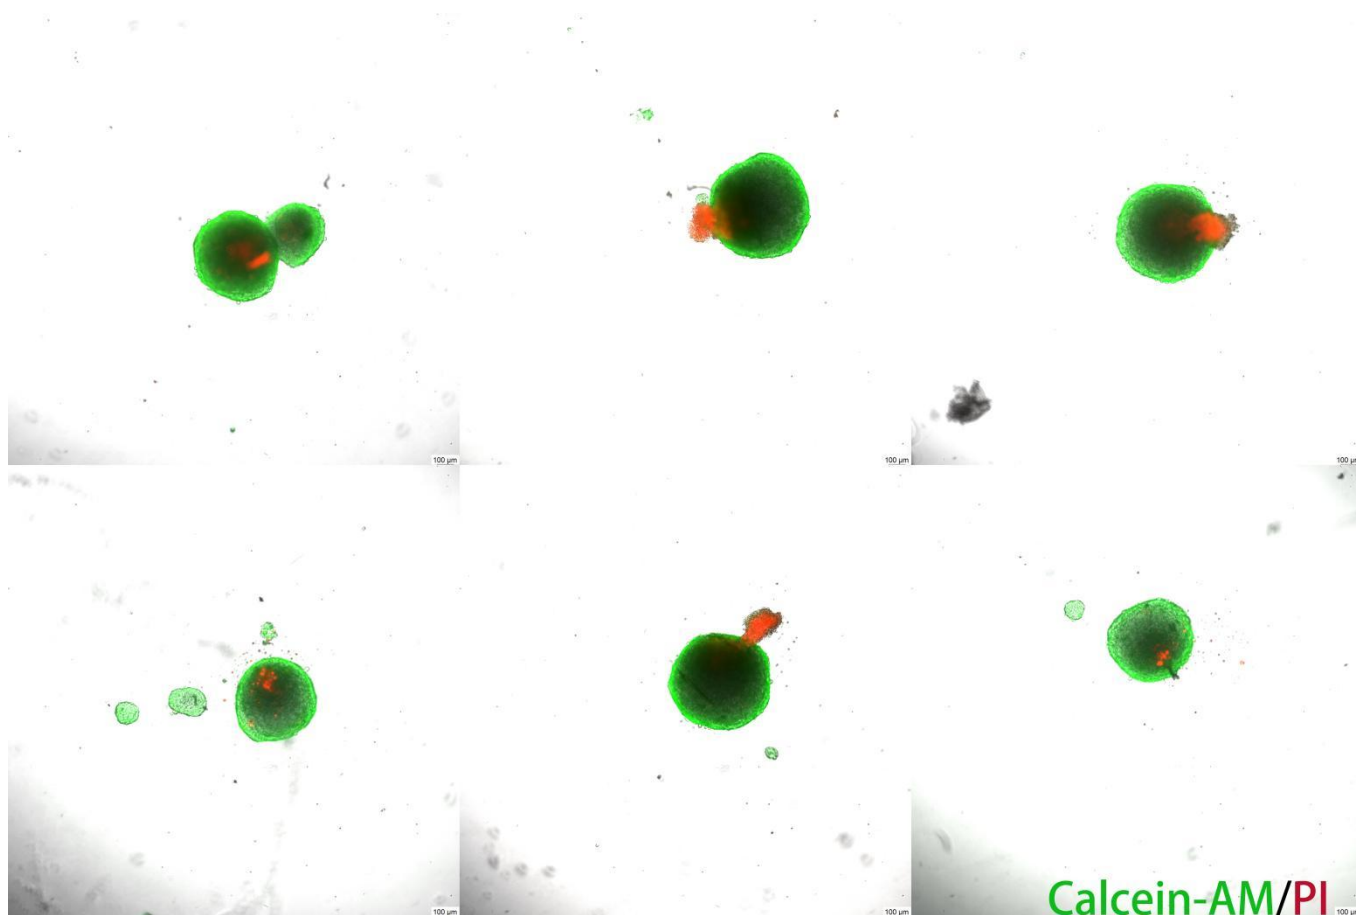

**Figure S4. Representative images showing multiple tumorsphere formation in the ULA 96-well plate (scale bar:100 μm).**



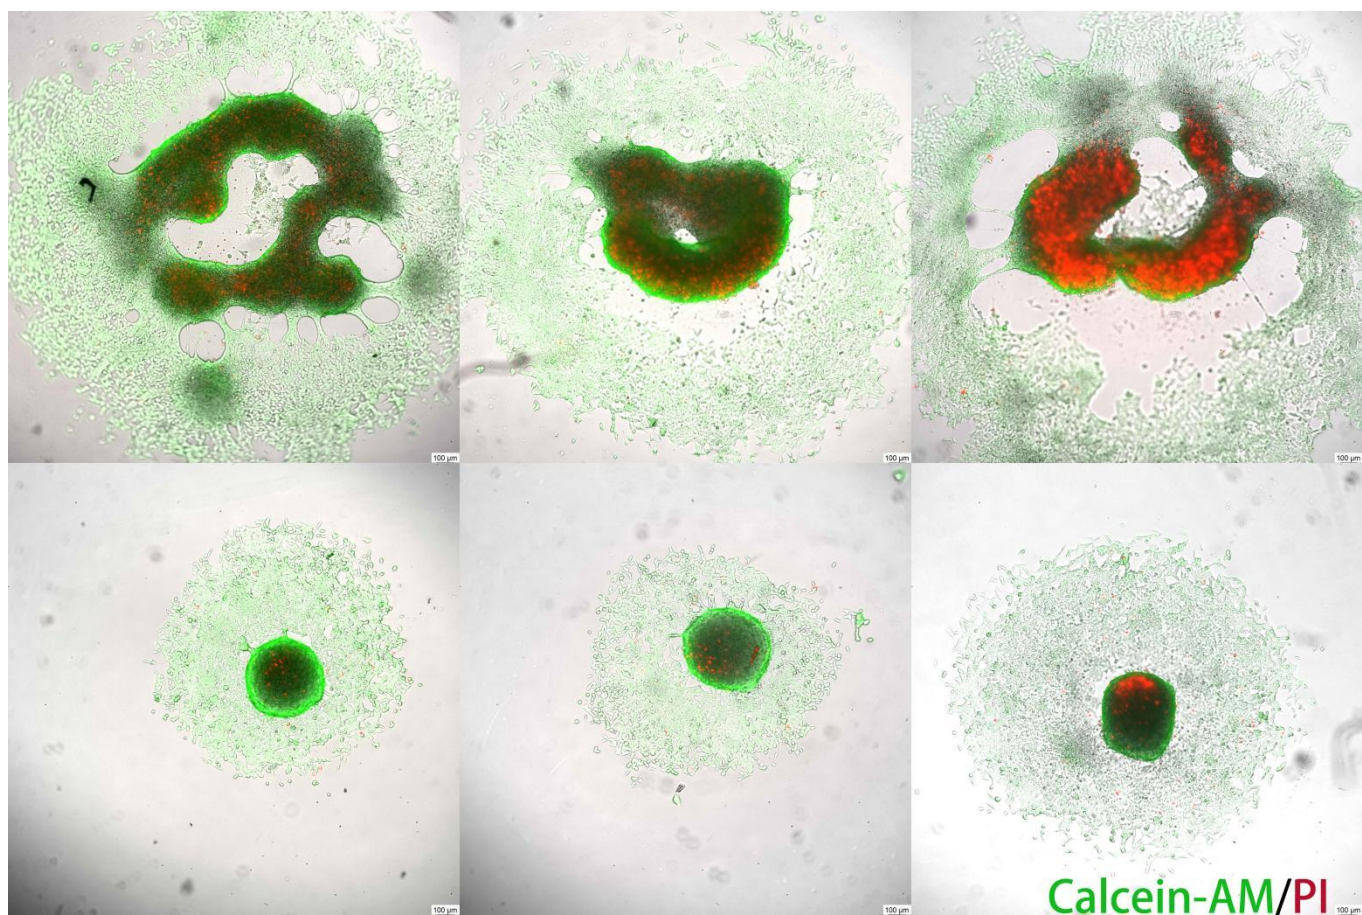

**Figure S5. Representative images showing incomplete elimination of cell adhesion in the ULA 96-well plate (scale bar:100 μm).**

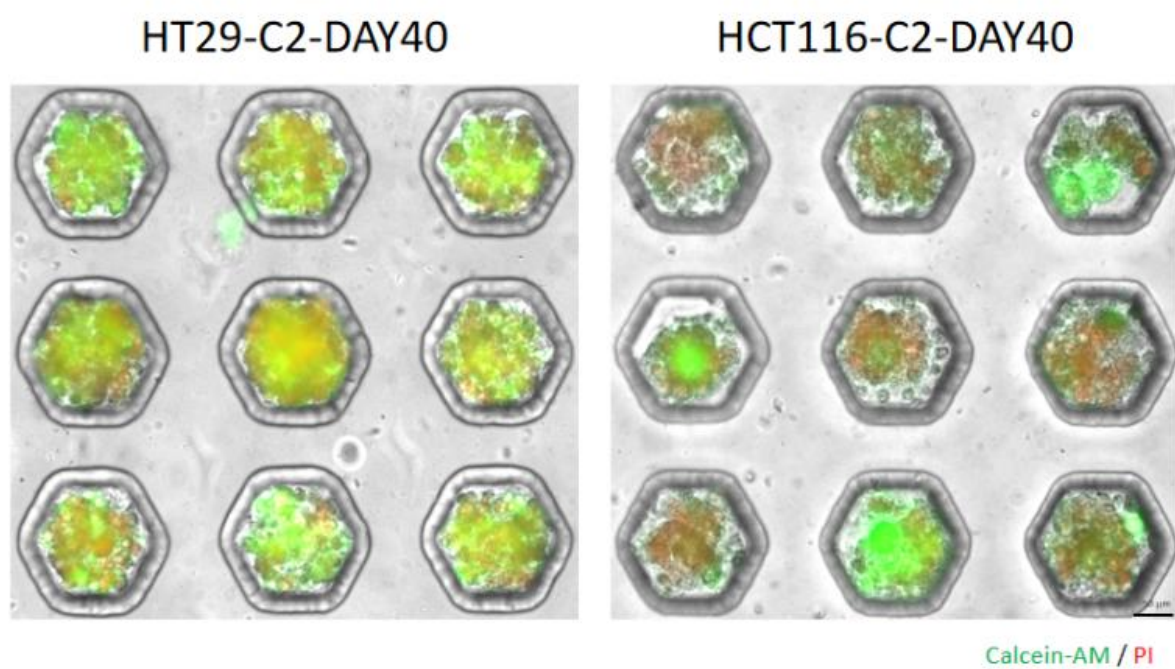

**Figure S6. Live/dead staining of cells in C2 tumorspheres after a 40-day drug-free interval(scale bar:100  $\mu\text{m}$ ).**

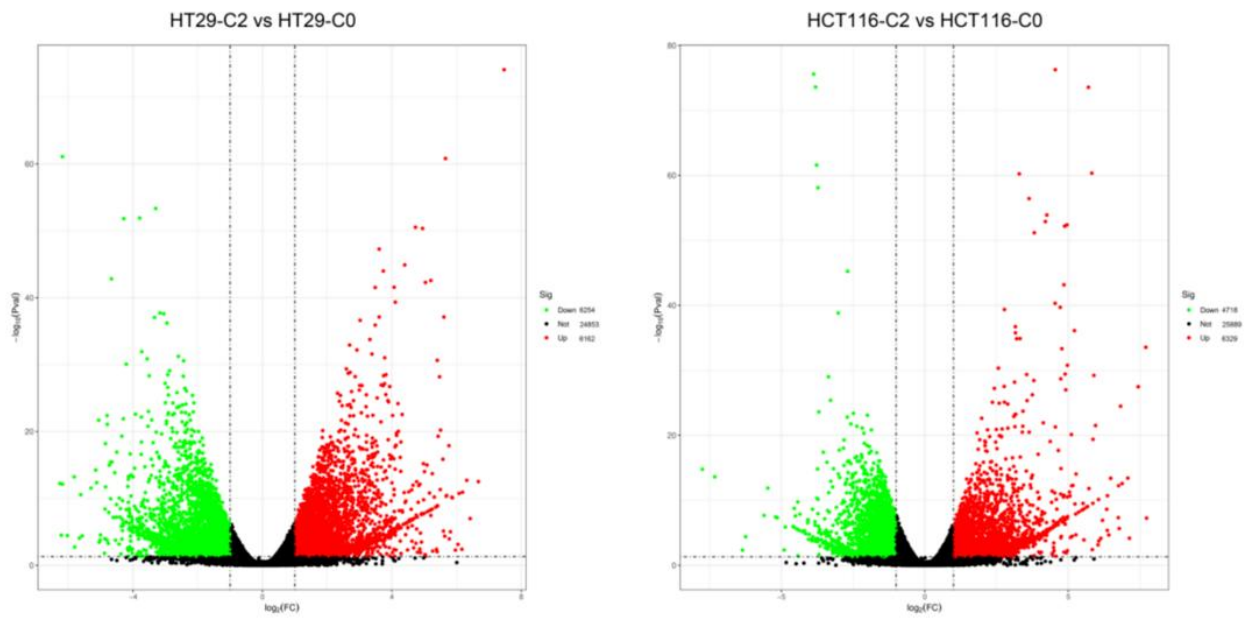

**Figure S7. Volcano plots depict the differentially expressed genes between experimental conditions, highlighting changes in tumorsphere cells derived from colorectal cancer subsequent to drug administration.**



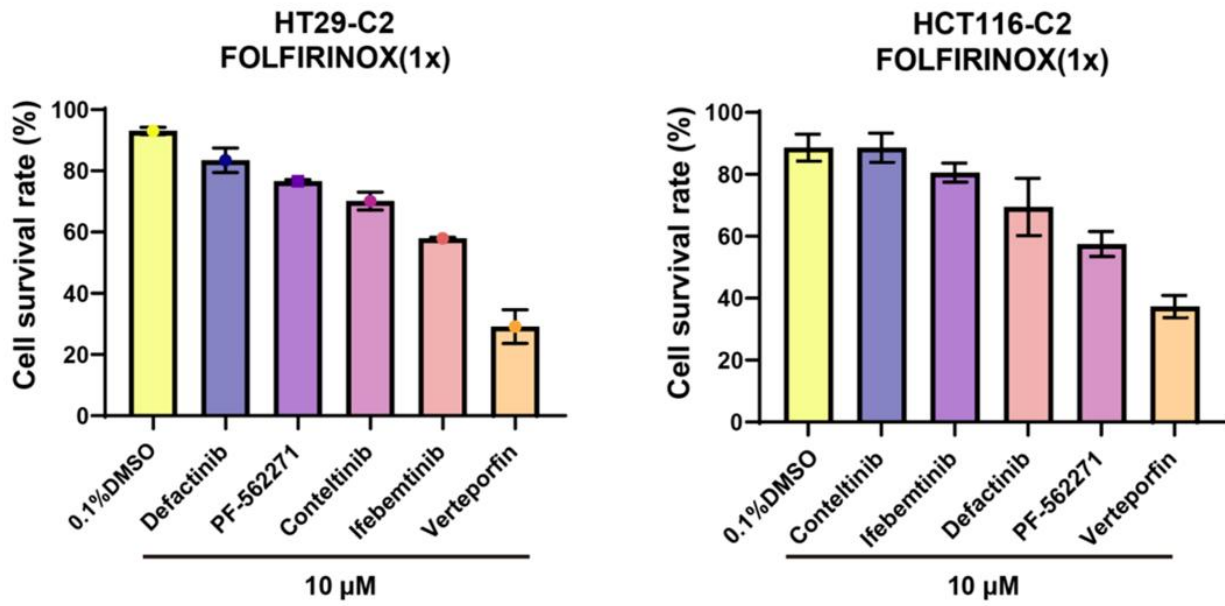

**Figure S8.** Survival rate of cells within C2 tumorspheres following drug treatments with FOLFIRINOX (1x) in combination with potential dormancy inhibitors.

## **Fluid Simulation**

Two-phase fluid transient simulations were conducted utilizing COMSOL version 6.1 to analyze flow velocity and pressure distributions, thereby facilitating the optimization of the microfluidic chip design (refer to Figure S1). Rectangular geometric arrays with three distinct depths—150  $\mu\text{m}$ , 200  $\mu\text{m}$ , and 250  $\mu\text{m}$ —were modeled to represent microchambers of varying depths. The simulation conditions assumed incompressible flow, ambient pressure fixed at 1 atm, and a temperature of 293.15 K. No-slip boundary conditions were applied, with an inlet flow rate set to 4  $\mu\text{L/s}$  and an outlet pressure maintained at 0 Pa. Surface tension was specified as  $1 \times 10^{-5}$  N/m. The simulations were performed over a duration of 5 seconds, employing a time step of 0.01 seconds, and a channel thickness of 1 mm was used in the model.

## **Contact Angle Measurement**

Two flat, fully cured PDMS pieces were utilized, with one piece being treated with a 2% hydrophilic copolymer solution. A 10  $\mu\text{L}$  droplet of pure water was applied vertically to the surface of the treated PDMS, and the droplet shape was analyzed using a contact angle measuring instrument (Dongguan Dingjing Instrument Co., LTD., SDC-2005). The software subsequently calculated the contact angle.
